# Supplementary material
Source: PubMed Central journal article supplement (PMC4542302)
Supplement: mmc1.pdf [file mmc1.pdf]

Cell Reports, Volume 9

Supplemental Information

## **Bacterial Metabolite Indole Modulates Incretin**

### **Secretion from Intestinal Enteroendocrine L Cells**

Catalin Chimerel, Edward Emery, David K. Summers, Ulrich Keyser, Fiona M. Gribble,  
and Frank Reimann

## Supplementary Information

### Bacterial metabolite indole modulates incretin secretion from intestinal enteroendocrine L-cells.

Catalin Chimerele, Edward Emery, David K. Summers, Ulrich Keyser, Fiona M. Gribble and Frank Reimann

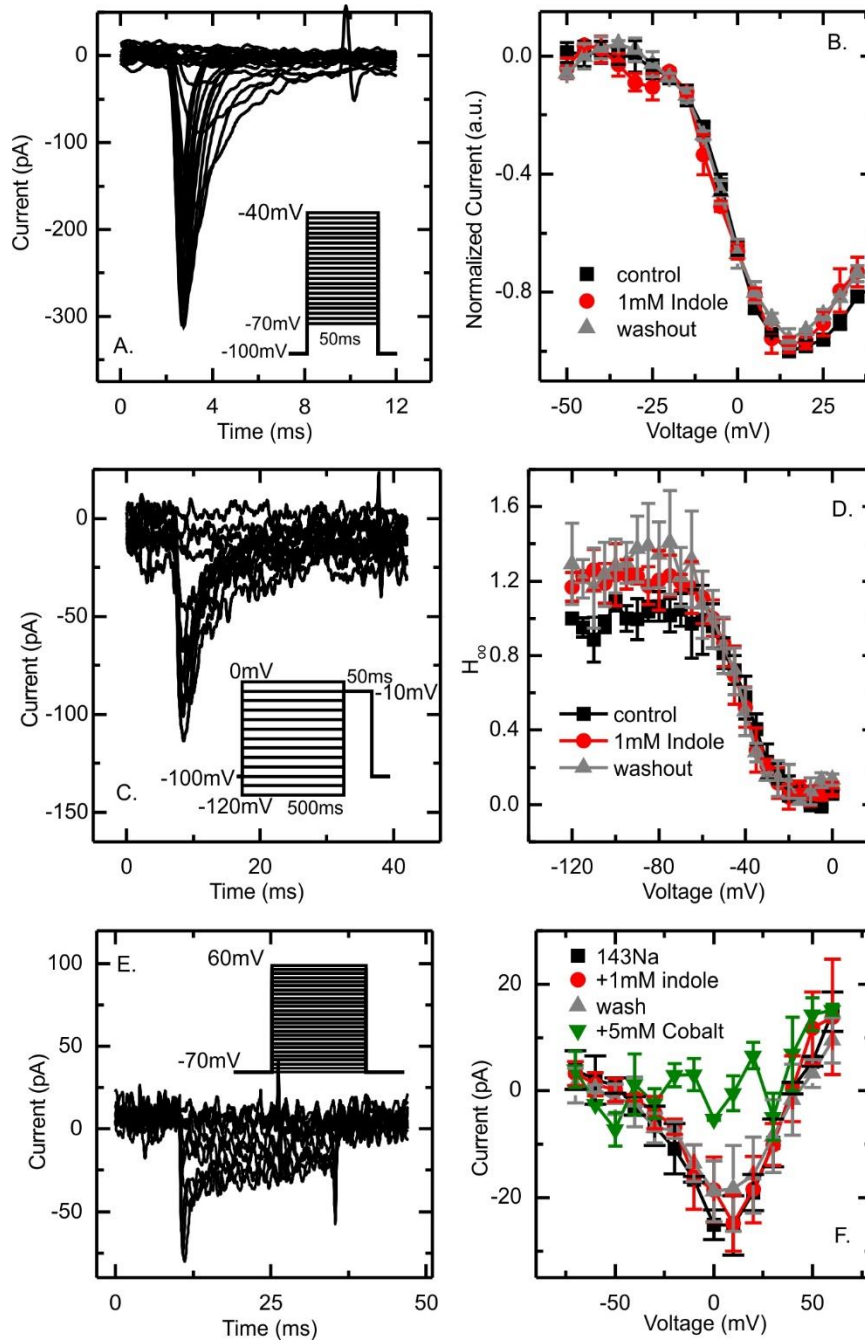

Supplementary Figure 1. Effect of indole on sodium and calcium currents in GLUTag cells, related to Figure 2. A. Current responses to 50 ms voltage steps of 5 mV increments were

applied from a holding potential of -100 mV (shown in the inset) applied in a whole cell voltage clamp recording in saline buffer containing inhibitors of voltage gated K<sup>+</sup> channels (see material and methods). Recordings were done in a whole cell voltage clamp recording where 50 ms voltage steps of 10 mV increments were applied from a holding potential of -100 mV. The raw data shown in panel A were down-sampled from 10 kHz to 1 kHz with a digital low pass filter (Clampfit 10.3.1.4). **B.** Current voltage relationship of the peak currents obtained when activating voltage gated Na<sup>+</sup> channels as in A. Each individual experiment was normalized to the maximum peak current at +15 mV control. Data show are mean ± SEM of n=3 cells. **C.** Steady-state inactivation of Na<sup>+</sup> currents measured by holding the membrane at -100 mV for 500 ms at conditioning voltages between -120 and 0 mV (at 5 mV increments) before stepping to -10 mV for 50 ms and then to -100 mV. The inset shows the voltage pulse protocol. Only the current response to the test pulse to -10 mV is shown. The raw data shown in panel A were down-sampled from 10 kHz to 1 kHz with a digital low pass filter (Clampfit 10.3.1.4). An electrical interference Filter (Clampfit 10.3.1.4) was applied to remove the power line interference at 50 Hz. **D.** Mean peak currents from cells recorded as in C, normalized to the maximum peak current at -120 mV control for each individual experiment ( $H_{\infty}$ ), and plotted against the holding potential applied during the conditioning pulses. Data show are mean ± SEM of N=3 cells. **E.** Current responses to 25 ms voltage steps of 5 mV increments, applied from a holding potential of -70 mV (shown in the inset), in a whole cell voltage clamp recording. Voltage gated Na<sup>+</sup> and K<sup>+</sup> current were blocked with specific inhibitors (see material and methods). The raw data shown in panel A were down-sampled from 10 kHz to 1 kHz with a digital low pass filter (Clampfit 10.3.1.4). An electrical interference Filter (Clampfit 10.3.1.4) was applied to remove the power line interference at 50 Hz. **F.** Current voltage relationship of the peak currents obtained from cells recorded as in A (N=3).
